# Supplementary material for: Multi-functional stretchable sensors based on a 3D-rGO wrinkled microarchitecture
Source: Royal Society of Chemistry journal article supplement (doi:10.1039/c9na00429g), 2019-01-01
Supplement: c9na00429g1.pdf [file c9na00429g1.pdf]

## Supporting Information

# Multi-functional Stretchable Sensors Based on 3D-rGO Wrinkled Microarchitecture

*Jin Jia, † Jianping Deng, \*† and Kai Pan\*†*

†College of Materials Science and Engineering (CMSE), Beijing University of Chemical Technology,

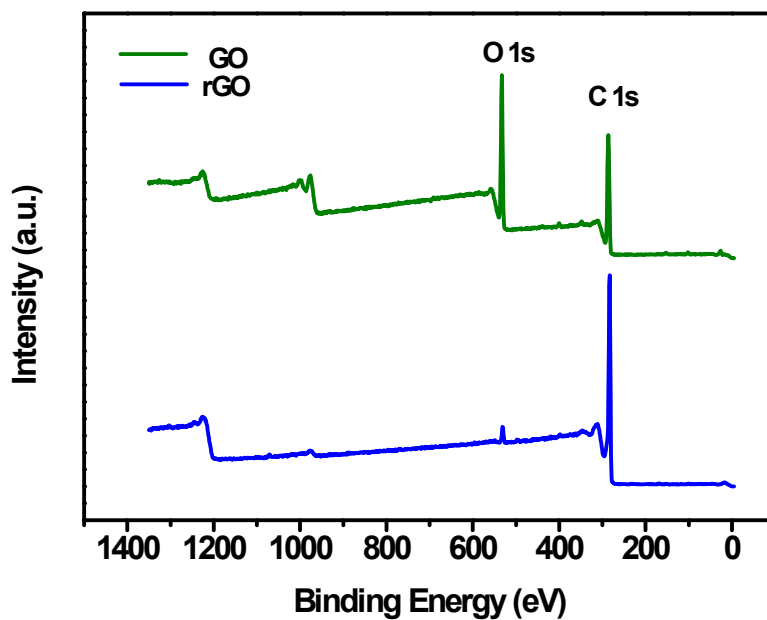

Chaoyang District North Third Ring Road 15, Beijing 100029, China

**Figure S1.** Survey XPS spectra of GO (before reduction) and rGO (after reduction).

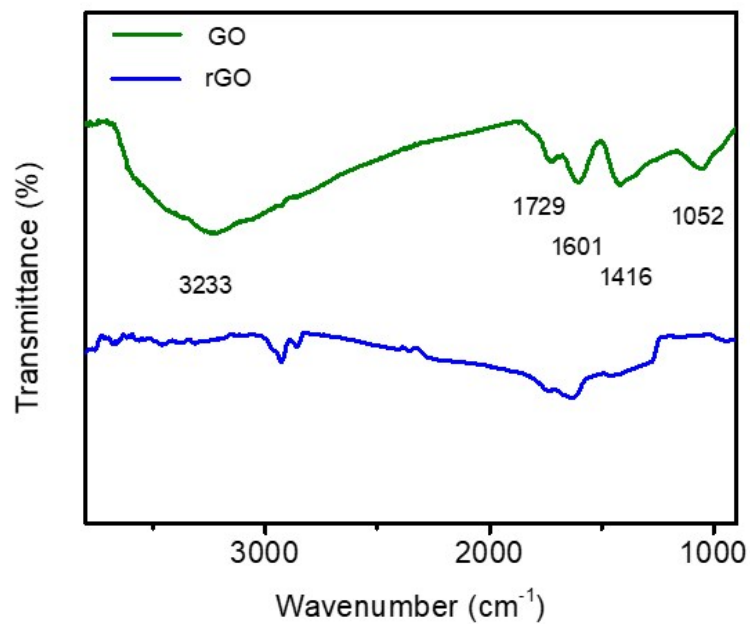

**Figure S2.** FTIR spectra of GO (before reduction) and rGO (after reduction).

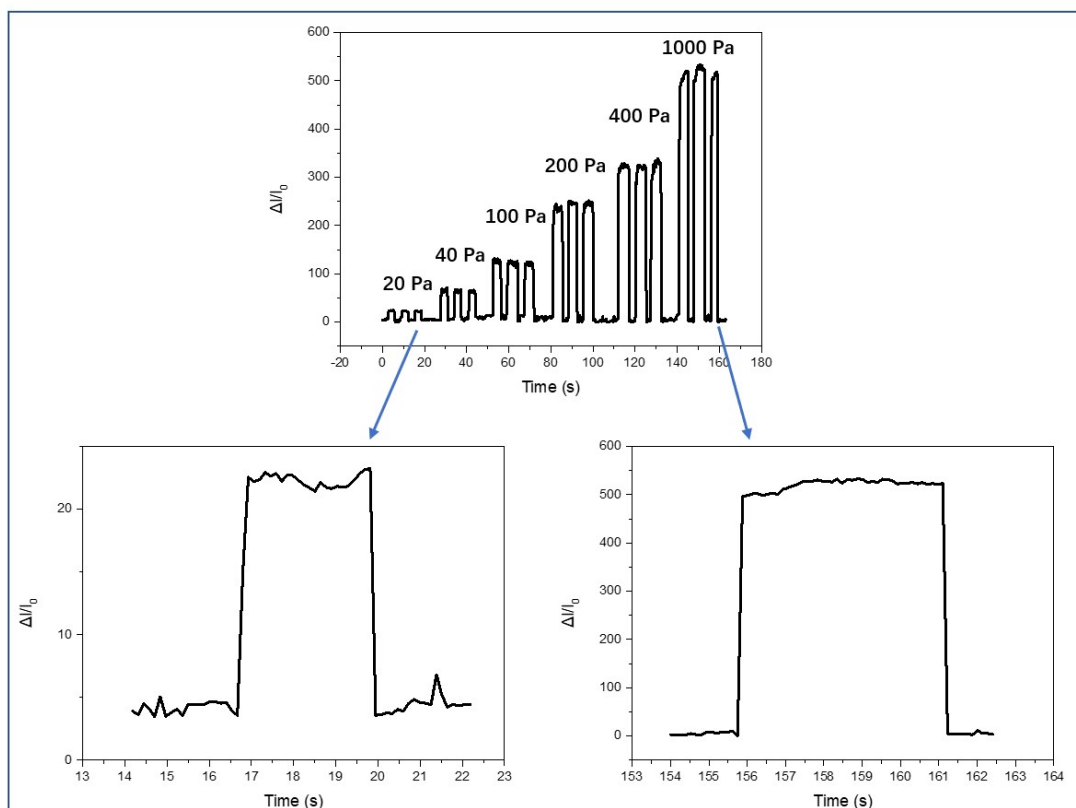

**Figure S3.** The time history of the input load in Fig. 4 a, b, c.
